# Supplementary material for: Enhancing the efficiency of Cu2ZnSn(S,Se)4solar cells by variable-temperature sulfoselenization
Source: Royal Society of Chemistry journal article supplement (doi:10.1039/d3tc01792c), 2023-01-01
Supplement: d3tc01792c1.pdf [file d3tc01792c1.pdf]

## Enhancing efficiency of $\text{Cu}_2\text{ZnSn}(\text{S},\text{Se})_4$ solar cells by variable temperature sulfoselenation

Yonggang Zhao, Congyan Xu, Zhineng Zhou, Yufei Chen, Ying Zhang, Lang Wu,  
Xu Su, Xinghuan Hu, Shurong Wang\*  
Key Laboratory of Rural Energy Engineering in Yunnan Province, Yunnan Normal  
University, Kunming 650500, PR China.

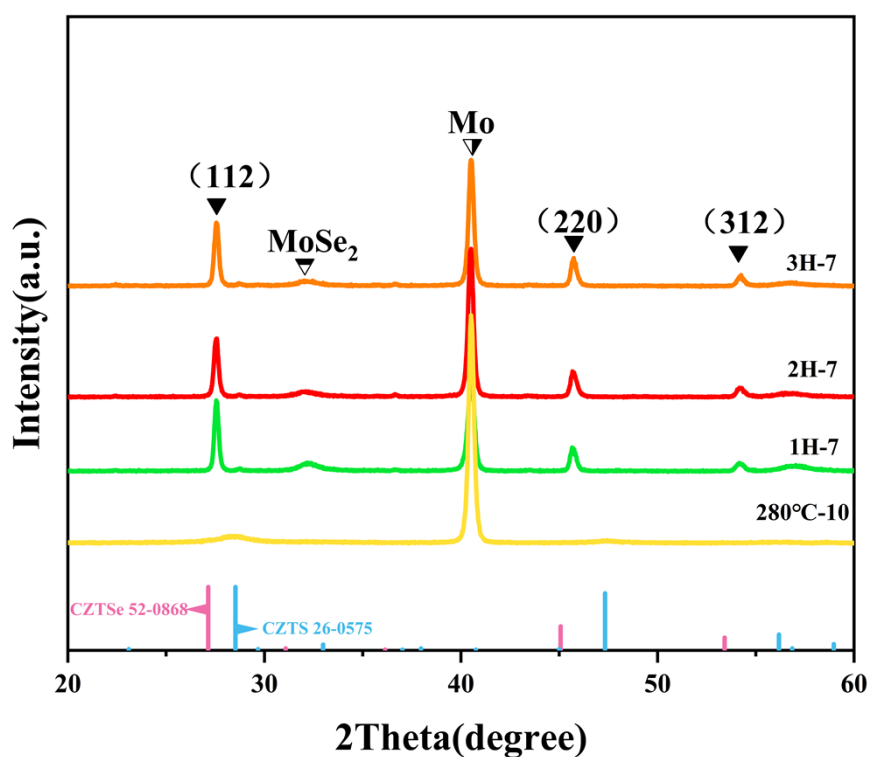

Fig. S1 XRD patterns of CZTSSe films prepared for different sulfoselenation processes.

\* Corresponding author. E-mail address: [shrw88@aliyun.com](mailto:shrw88@aliyun.com) (S. Wang).

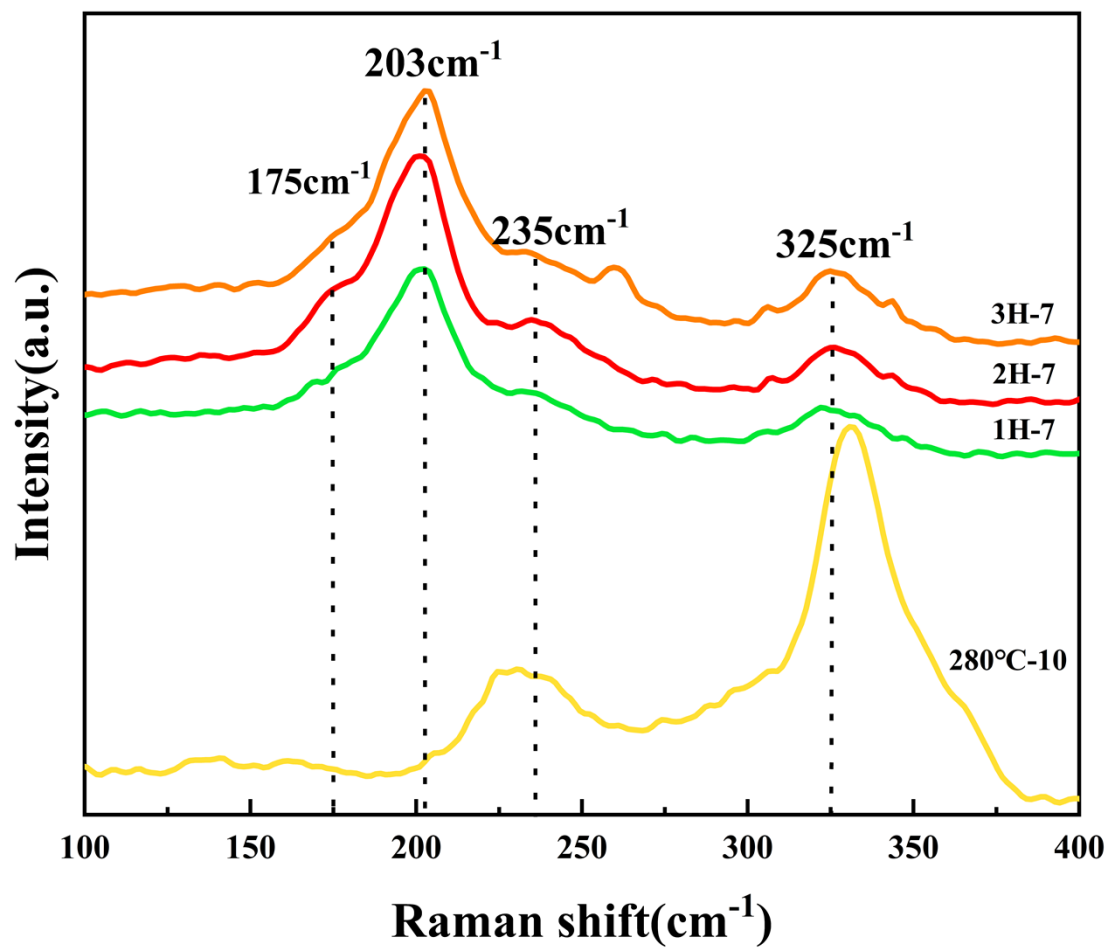

Fig. S2 Raman spectra of CZTSSe films prepared using different sulfoselenization processes.

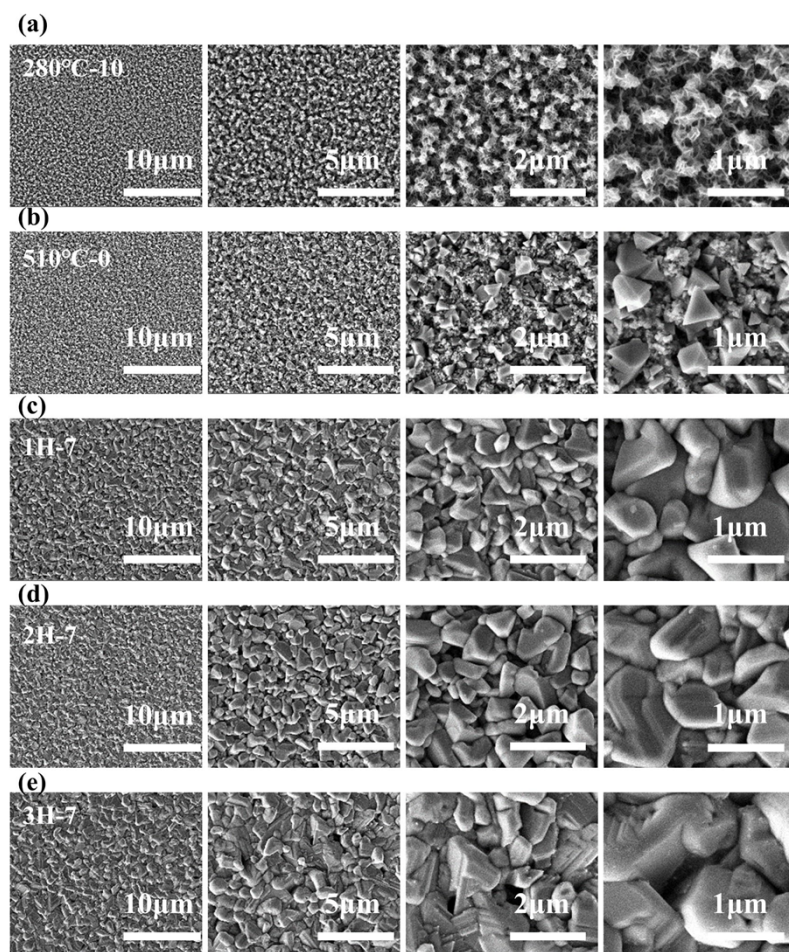

Fig. S3 Top views of different scales of CZTSSe films, (a) 280°C -10, (b) 510°C-0, (c) 1H-7, (d) 2H-7, (e) 3H-7.
